# Supplementary material for: Cell death induced by ozone and various non-thermal plasmas: therapeutic perspectives and limitations
Source: PubMed Central journal article supplement (PMC4238021; doi:10.1038/srep07129), 2014-11-20
Supplement: srep07129-s1.pdf [file srep07129-s1.pdf]

## Supplementary Information

### **Cell death induced by ozone and various non-thermal plasmas: therapeutic perspectives and limitations**

**Oleg Lunov<sup>1</sup>, Vitalii Zablotskii<sup>1</sup>, Olexander Churpita<sup>1</sup>, Eliška Chánová<sup>2</sup>, Eva Syková<sup>3</sup>,  
Alexandr Dejneka<sup>1</sup> and Šárka Kubinová<sup>1,3</sup>**

<sup>1</sup>Institute of Physics AS CR, Prague, Czech Republic

<sup>2</sup>Institute of Macromolecular Chemistry AS CR, Prague, Czech Republic

<sup>3</sup>Institute of Experimental Medicine AS CR, Prague, Czech Republic

Correspondence and requests for materials should be addressed to O.L. (email: lunov@fzu.cz).

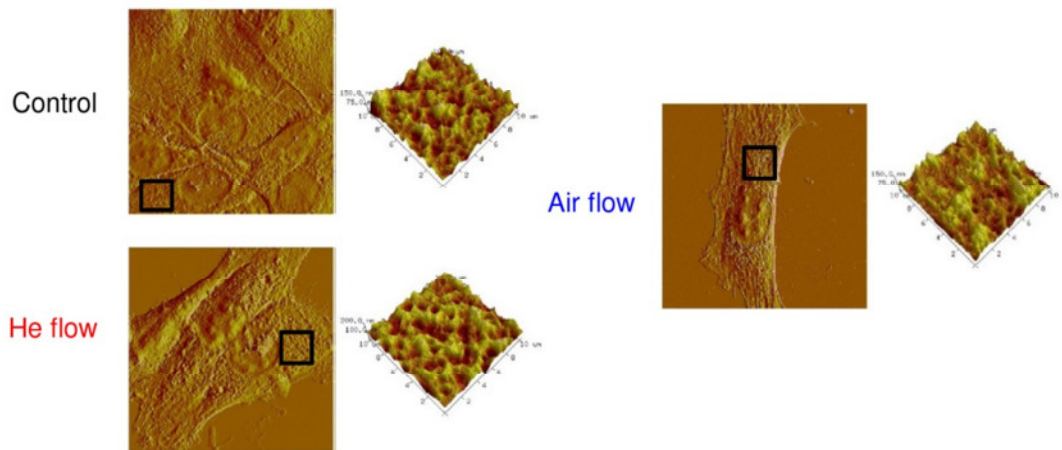

**Supplementary Figure S1 AFM analysis of cell membrane integrity.** 3T3 fibroblasts were treated with air, helium flow (no plasma treatment), and then 4 h after treatment cells were fixed and imaged with AFM microscopy. Images represent a 90 x 90  $\mu\text{m}$  area of scan. The black square areas indicate where a 3D 10 x 10  $\mu\text{m}$  scan has been performed.

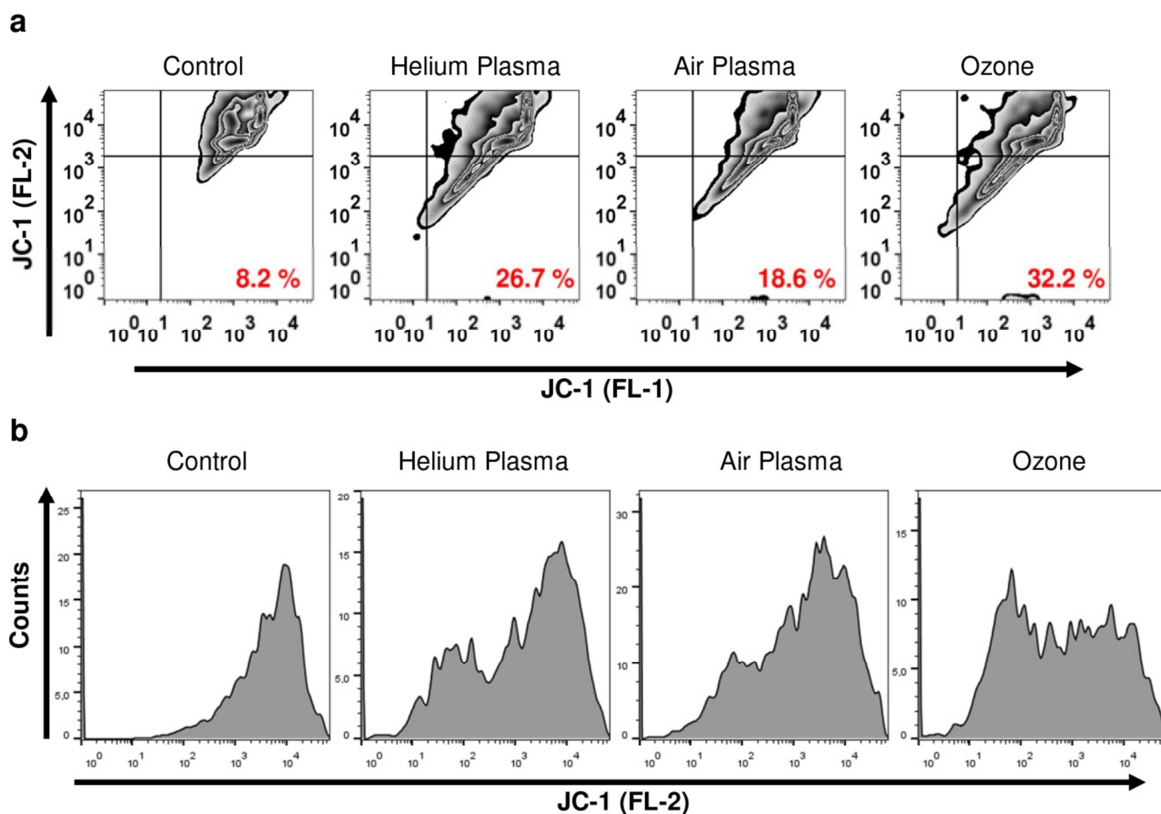

**Supplementary Figure S2 Air, helium plasma and ozone effects on mitochondrial metabolic activity of 3T3 fibroblasts 4 h after treatment.** (a, b) Assessment of mitochondrial membrane integrity state in treated cells with air and helium plasma in comparison with ozone. Cells were stained with JC-1 probe, the JC-1 fluorescence was measured using flow cytometry.
